# Supplementary material
Source: Springer Nature journal article supplement (https://www.springermedizin.de/resource/supplementary/12879_2009_918_MOESM3_ESM.pdf/9449638)

untitled 3 Display-3

60 120 180 240 300 360 420 480 540 600 660 720 780

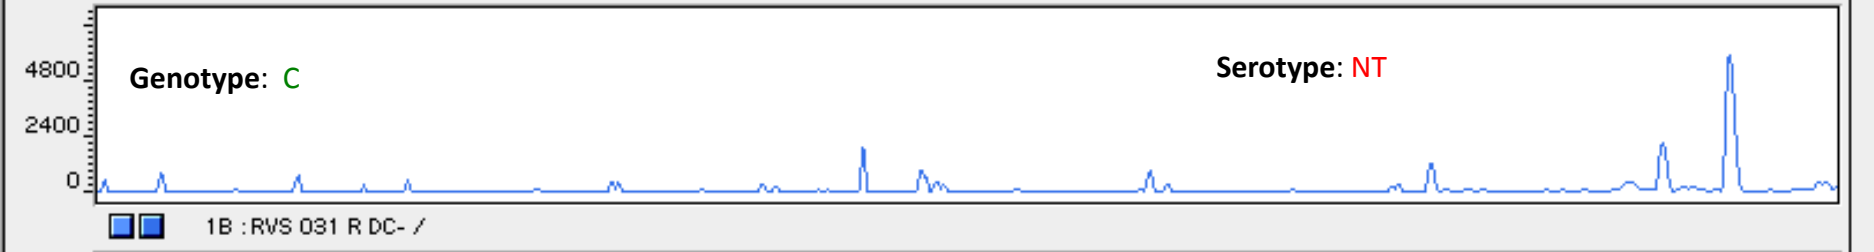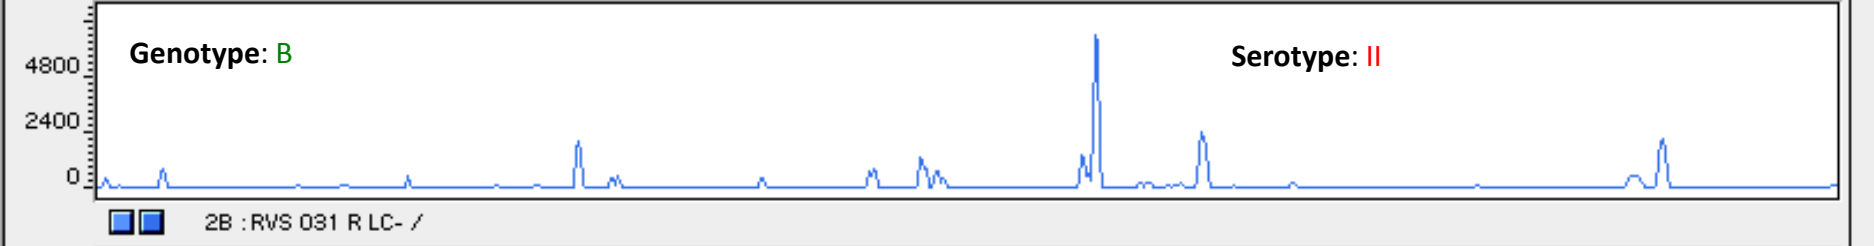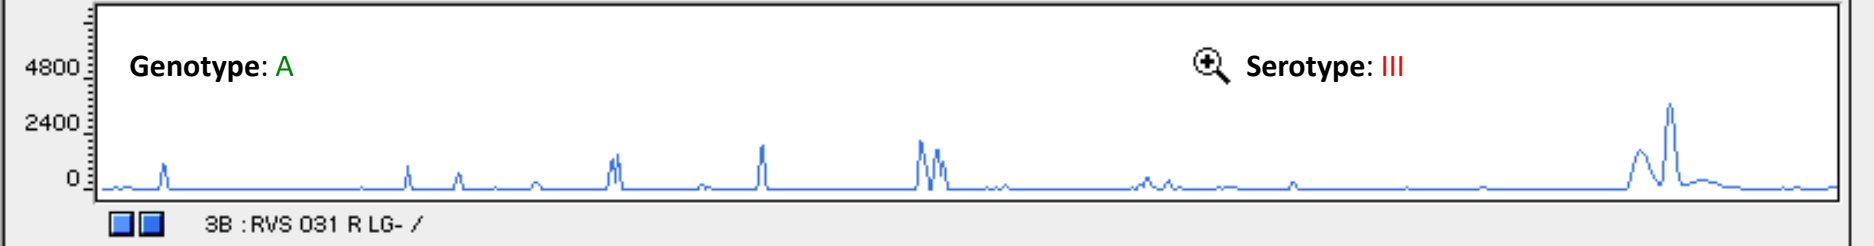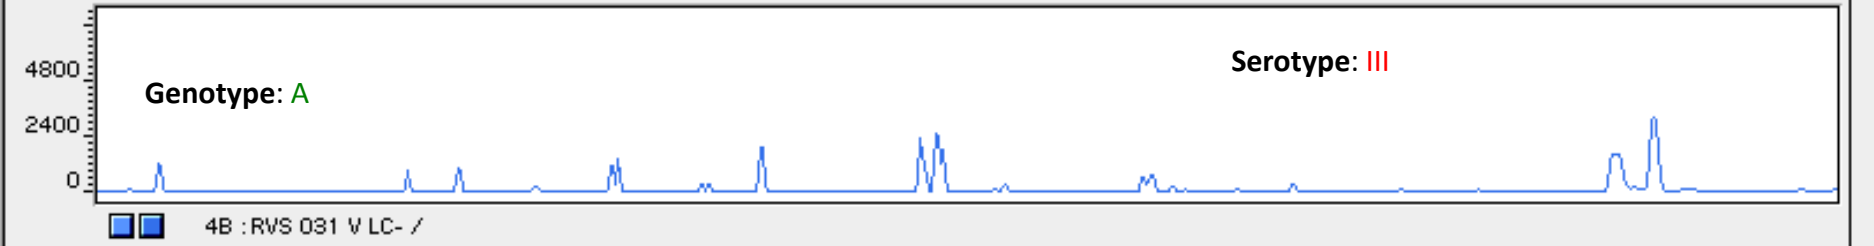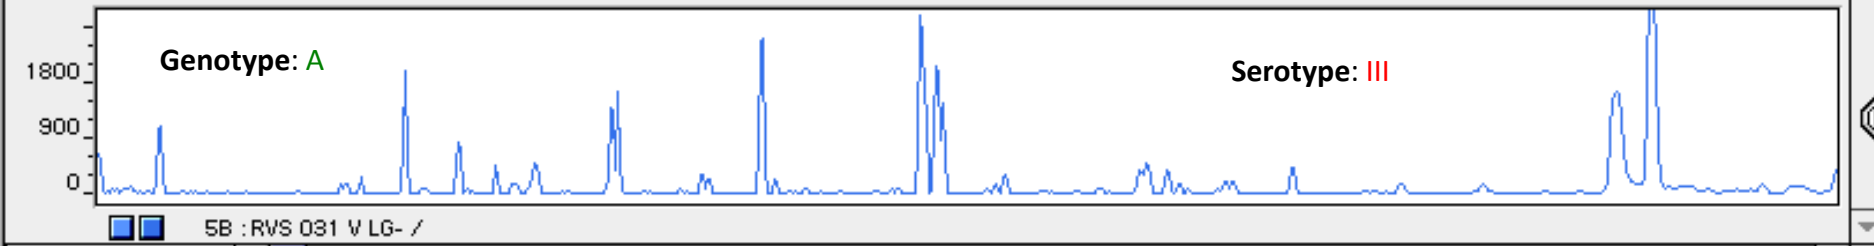

Supplement: MOESM3 [file 9449638]
